# Supplementary material for: Smoking accelerates aging of the small airway epithelium
Source: Respir Res. 2014 Sep 24;15(1):94. doi: 10.1186/s12931-014-0094-1 (PMC4189169; doi:10.1186/s12931-014-0094-1)

## **Supplemental Methods**

### **Inclusion and Exclusion Criteria**

#### **Healthy nonsmokers**

##### **Inclusion criteria**

- Males and females, at least 18 years old
- Provide informed consent
- Normal physical examination
- HIV1 negative
- Not pregnant (females)
- Good health without history of chronic lung disease, including asthma, and without recurrent or recent (within 3 months) acute pulmonary disease
- Normal routine laboratory evaluation, including general hematologic studies, general serologic/immunologic studies, general biochemical analyses, and urine analysis
- Normal PA and lateral chest X-ray
- Normal electrocardiogram (sinus bradycardia, premature atrial contractions are permissible)
- No history of allergies to medications used in the bronchoscopy procedure
- Not taking any medications relevant to lung disease or having an effect on the airway epithelium
- Willingness to participate in the study
- Self-reported nonsmokers, with smoking status validated by the absence of nicotine and cotinine in urine (nicotine<2 ng/ml, cotinine<5 ng/ml)

##### **Exclusion criteria**

- Unable to meet the inclusion criteria
- Current active infection or acute illness of any kind
- Evidence of malignancy within the past 5 years
- Alcohol or drug abuse within the past 6 months

#### **Healthy active smokers**

##### **Inclusion criteria**

- Males and females, at least 18 years old
- Provide informed consent
- Normal physical examination
- HIV1 negative
- Not pregnant (females)
- Good health without history of chronic lung disease, including asthma, and without recurrent or recent (within 3 months) acute pulmonary disease
- Normal routine laboratory evaluation, including general hematologic studies, general serologic/immunologic studies, general biochemical analyses, and urine analysis
- Normal PA and lateral chest X-ray
- Normal electrocardiogram (sinus bradycardia, premature atrial contractions are permissible)
- No history of allergies to medications used in the bronchoscopy procedure

- Not taking any medications relevant to lung disease or having an effect on the airway epithelium
- Willingness to participate in the study
- Self-reported current daily smokers with any number of pack-yr, validated by urine nicotine  $\geq 30$  ng/ml and cotinine  $\geq 50$  ng/ml

**Exclusion criteria**

- Unable to meet the inclusion criteria
- Current active infection or acute illness of any kind
- Evidence of malignancy within the past 5 years
- Alcohol or drug abuse within the past 6 months

## References

1. de Magalhaes JP, Curado J, Church GM: **Meta-analysis of age-related gene expression profiles identifies common signatures of aging.** *Bioinformatics* 2009, **25**:875-881.

**Supplemental Table I. List of Aging Signature Genes Expressed in Small Airway Epithelium<sup>1,2</sup>**

| <b>Probeset ID<sup>3</sup></b> | <b>Gene symbol</b> | <b>Gene title</b>                                                               |
|--------------------------------|--------------------|---------------------------------------------------------------------------------|
| 234312_s_at                    | ACSS2              | acyl-CoA synthetase short-chain family member 2                                 |
| 201346_at                      | ADIPOR2            | adiponectin receptor 2                                                          |
| 209369_at                      | ANXA3              | annexin A3                                                                      |
| 200782_at                      | ANXA5              | annexin A5                                                                      |
| 201525_at                      | APOD               | apolipoprotein D                                                                |
| 207508_at                      | ATP5G3             | ATP synthase; H <sup>+</sup> transporting; mitochondrial Fo complex; subunit C3 |
| 201891_s_at                    | B2M                | beta-2-microglobulin                                                            |
| 218232_at                      | C1QA               | complement component 1; q subcomponent; A chain                                 |
| 202953_at                      | C1QB               | complement component 1; q subcomponent; B chain                                 |
| 225353_s_at                    | C1QC               | complement component 1; q subcomponent; C chain                                 |
| 217767_at                      | C3                 | complement component 3                                                          |
| 214428_x_at                    | C4A                | complement component 4A (Rodgers blood group)                                   |
| 201310_s_at                    | C5orf13            | chromosome 5 open reading frame 13                                              |
| 206209_s_at                    | CA4                | carbonic anhydrase IV                                                           |
| 205626_s_at                    | CALB1              | calbindin 1; 28kDa                                                              |
| 201560_at                      | CLIC4              | chloride intracellular channel 4                                                |
| 208791_at                      | CLU                | clusterin                                                                       |
| 1556499_s_at                   | COL1A1             | collagen; type I; alpha 1                                                       |
| 215076_s_at                    | COL3A1             | collagen; type III; alpha 1                                                     |
| 213110_s_at                    | COL4A5             | collagen; type IV; alpha 5                                                      |
| 202902_s_at                    | CTSS               | cathepsin S                                                                     |
| 823_at                         | CX3CL1             | chemokine (C-X3-C motif) ligand 1                                               |
| 218172_s_at                    | DERL1              | Der1-like domain family; member 1                                               |
| 219350_s_at                    | DIABLO             | diablo homolog (Drosophila)                                                     |
| 201842_s_at                    | EFEMP1             | EGF-containing fibulin-like extracellular matrix protein 1                      |
| 205738_s_at                    | FABP3              | fatty acid binding protein 3                                                    |
| 203561_at                      | FCGR2A             | Fc fragment of IgG; low affinity IIa; receptor (CD32)                           |
| 210889_s_at                    | FCGR2B             | Fc fragment of IgG; low affinity IIb; receptor (CD32)                           |
| 202748_at                      | GBP2               | guanylate binding protein 2; interferon-inducible                               |
| 209249_s_at                    | GHITM              | growth hormone inducible transmembrane protein                                  |
| 212335_at                      | GNS                | glucosamine (N-acetyl)-6-sulfatase                                              |
| 201141_at                      | GPNMB              | glycoprotein (transmembrane) nmb                                                |
| 203924_at                      | GSTA1              | glutathione S-transferase alpha 1                                               |
| 209458_x_at                    | HBA1 /// HBA2      | hemoglobin; alpha 1 /// hemoglobin; alpha 2                                     |
| 223640_at                      | HCST               | hematopoietic cell signal transducer                                            |
| 209398_at                      | HIST1H1C           | histone cluster 1; H1c                                                          |
| 211530_x_at                    | HLA-G              | major histocompatibility complex; class I; G                                    |
| 212592_at                      | IGJ                | immunoglobulin J polypeptide                                                    |
| 209821_at                      | IL33               | interleukin 33                                                                  |
| 201776_s_at                    | KIAA0494           | KIAA0494                                                                        |
| 201720_s_at                    | LAPTM5             | lysosomal protein transmembrane 5                                               |
| 208949_s_at                    | LGALS3             | lectin; galactoside-binding; soluble; 3                                         |
| 200704_at                      | LITAF              | lipopolysaccharide-induced TNF factor                                           |
| 1555745_a_at                   | LYZ                | lysozyme                                                                        |
| 224918_x_at                    | MGST1              | microsomal glutathione S-transferase 1                                          |
| 226818_at                      | MPEG1              | macrophage expressed 1                                                          |
| 200600_at                      | MSN                | moesin                                                                          |
| 213629_x_at                    | MT1F               | metallothionein 1F                                                              |

**Supplemental Table I. List of Aging Signature Genes Expressed in Small Airway Epithelium<sup>1,2</sup> (cont., page 2)**

| <b>Probeset ID<sup>3</sup></b> | <b>Gene symbol</b> | <b>Gene title</b>                                                  |
|--------------------------------|--------------------|--------------------------------------------------------------------|
| 200632_s_at                    | NDRG1              | N-myc downstream regulated 1                                       |
| 218320_s_at                    | NDUFB11            | NADH dehydrogenase (ubiquinone) 1 beta subcomplex; 11              |
| 200701_at                      | NPC2               | Niemann-Pick disease; type C2                                      |
| 207414_s_at                    | PCSK6              | proprotein convertase subtilisin/kexin type 6                      |
| 208777_s_at                    | PSMD11             | proteasome (prosome; macropain) 26S subunit; non-ATPase; 11        |
| 200627_at                      | PTGES3             | prostaglandin E synthase 3 (cytosolic)                             |
| 225562_at                      | RASA3              | RAS p21 protein activator 3                                        |
| 225931_s_at                    | RNF213             | ring finger protein 213                                            |
| 203186_s_at                    | S100A4             | S100 calcium binding protein A4                                    |
| 217728_at                      | S100A6             | S100 calcium binding protein A6                                    |
| 200986_at                      | SERPING1           | serpin peptidase inhibitor; clade G (C1 inhibitor); member 1       |
| 201739_at                      | SGK1               | serum/glucocorticoid regulated kinase 1                            |
| 209875_s_at                    | SPP1               | secreted phosphoprotein 1                                          |
| 207332_s_at                    | TFRC               | transferrin receptor (p90; CD71)                                   |
| 212352_s_at                    | TMED10             | transmembrane emp24-like trafficking protein 10 (yeast)            |
| 201008_s_at                    | TXNIP              | thioredoxin interacting protein                                    |
| 208909_at                      | UQCRFS1            | ubiquinol-cytochrome c reductase; Rieske iron-sulfur polypeptide 1 |
| 201568_at                      | UQCRQ              | ubiquinol-cytochrome c reductase; complex III subunit VII; 9.5kDa  |
| 208626_s_at                    | VAT1               | vesicle amine transport protein 1 homolog (T. californica)         |

<sup>1</sup> 73 gene aging signature was taken from de Magalhaes et al 2009.

<sup>2</sup> 67 genes of the published 73 gene aging signature contained U133 2.0 probesets and were expressed in the small airway epithelium of healthy nonsmokers (P call  $\geq 10$ ).

<sup>3</sup> Affymatrix U133 2.0 microarray.

### **Supplemental Figure Legends**

**Supplementary Figure 1.** Southern analysis of telomere length in the small airway epithelium and peripheral blood leukocytes of nonsmokers and smokers. Telomere length [terminal restriction fragment (TRF)] of DNA isolated from the small airway epithelium and blood of male healthy nonsmokers and male healthy smokers was quantified by Southern blot analysis. **A.** Representative blot from small airway epithelium (SAE) samples. **B.** Representative blot from blood leukocyte samples. For both **A** and **B** lanes 1-3 represent 3 independent nonsmoker samples and lanes 4-6 represent 3 independent smoker samples.

**Supplementary Figure 2.** Telomere length in the small airway epithelium of nonsmokers and smokers from different racial categories. DNA was isolated from the small airway epithelium of male healthy nonsmokers (n=8 Black, n=6 White, and n=7 Other) and male healthy smokers (n=14 Black, n=3 White and n=5 Other) and telomere length [terminal restriction fragment (TRF)] quantified by Southern analysis. Within each phenotype the telomere length of subjects was separated based on racial group. Data shown is represented as the average  $\pm$  standard deviation of the TRF length (kb). The difference in mean TRF length between phenotypes was calculated by 2-tailed Students t test.

**Supplementary Figure 3.** Telomere length in the small airway epithelium and peripheral blood leukocytes of nonsmokers and smokers. DNA was isolated from the small airway epithelium and peripheral blood leukocytes of male healthy nonsmokers (n=12) and male healthy smokers (n=16) and telomere length [terminal restriction fragment (TRF)] quantified by Southern analysis. Data shown is represented as the average  $\pm$  standard deviation of the TRF length (kb). The difference in mean TRF length between phenotypes was calculated by 2-tailed Students t test.

**A. Southern (SAE)**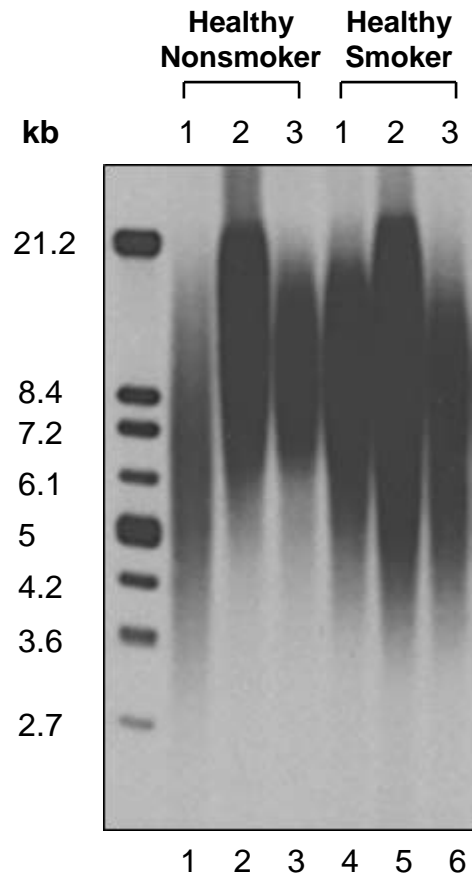**B. Southern (blood leukocytes)**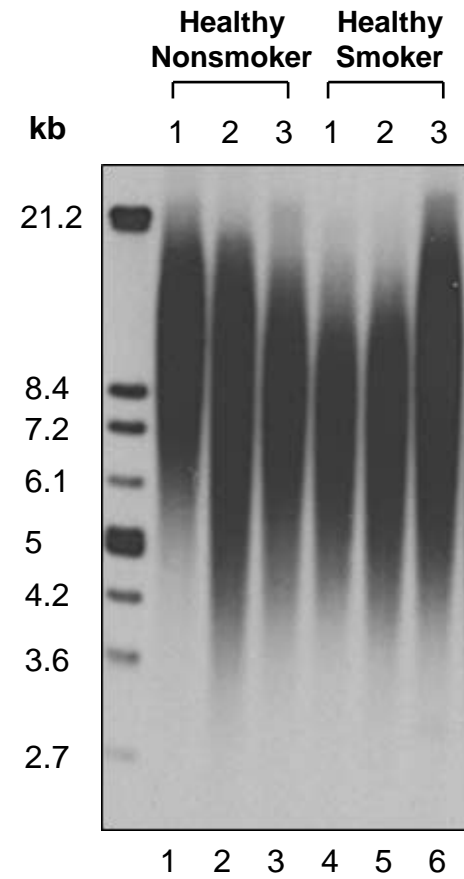

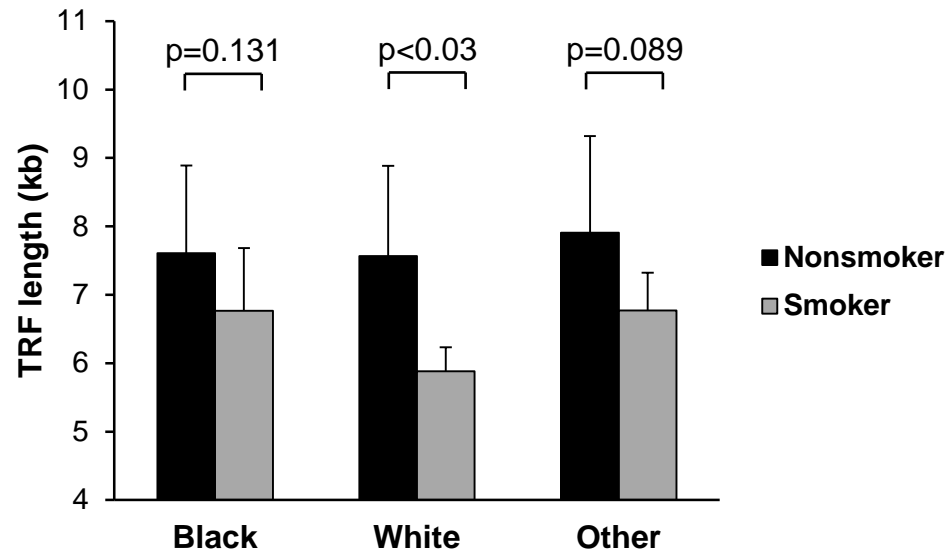

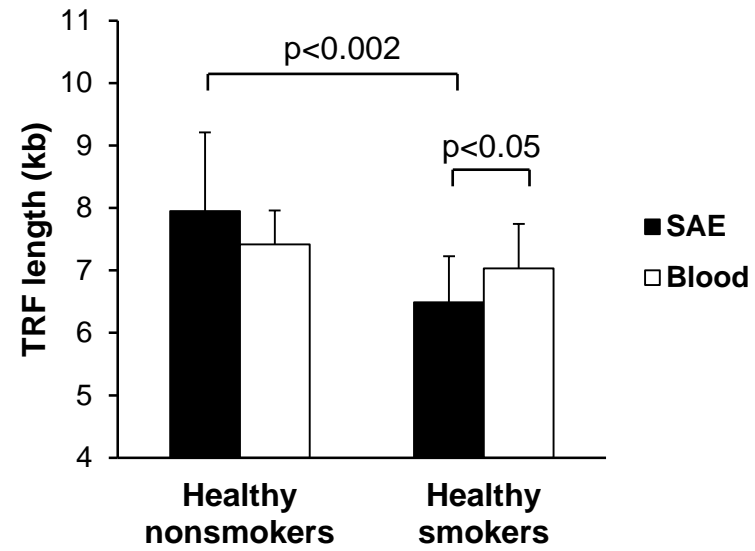

Supplement: Additional file 1: — Supplemental Data. [file 12931_2014_94_MOESM1_ESM.pdf]
